# Supplementary material for: The Mindfulness App Trial for Weight, Weight-Related Behaviors, and Stress in University Students: Randomized Controlled Trial
Source: PubMed Central journal article supplement (PMC6479283; doi:10.2196/12210), 2019-04-10

**Table 1. Mindfulness techniques in the app.**

| Mindfulness practice and techniques | Type   | Description                                                                                                                                                                                                                                      | Media used to teach this                       | Duration              |
|-------------------------------------|--------|--------------------------------------------------------------------------------------------------------------------------------------------------------------------------------------------------------------------------------------------------|------------------------------------------------|-----------------------|
| Observing the breath                | Formal | Involves focusing on each inhalation and exhalation. Importance of not thinking about anything else.                                                                                                                                             | Video demo, audios, and written lectures       | A few min up to 5 min |
| Diaphragmatic breathing             | Formal | Involves deeper and slower breathing. Full attention is paid to the breath                                                                                                                                                                       | Brief video demo, audios, and written lectures | 15 min                |
| Sitting meditation                  | Formal | Includes concentration meditation exercises (several) and loving kindness meditation.                                                                                                                                                            | Audios and written lectures                    | 20 min                |
|                                     |        | Concentration meditation focuses on a particular image that is empowering such as a waterfall for example and allows the participant to imagine being this image and overcoming anything that happens, resting still in awareness and breathing. |                                                |                       |
|                                     |        | Loving kindness meditation involves beginning with love and good wishes at a singular level and extending it to friends, then even enemies, and the whole universe                                                                               |                                                |                       |
| Walking meditation                  | Formal | Involves focusing on the breath and extending awareness to one's movement including the movement of one's feet, hips, and arms without deflecting one's thoughts                                                                                 | Written lectures                               | 20 minutes            |
| Body scan                           | Formal | Involves focusing on one's breath and extending awareness                                                                                                                                                                                        | Written lectures and audios                    | 45 minutes            |

Author 2019-2-8 3:39 PM

**Comment [1]:** Please note that per journal style, a very long table must be uploaded as a Multimedia Appendix. Please delete the table from the manuscript and upload it as a Multimedia Appendix on the website with the caption. In addition, cite this table as a Multimedia Appendix in the body of text as applicable. The table citations must also be emended accordingly. If other Multimedia Appendices are cited in the manuscript, please ensure that all appendices are cited in a sequential order.

|                                             |          |                                                                                                                                                                                                                                                                                            |                                                                                                                                                                 |                                                                                       |
|---------------------------------------------|----------|--------------------------------------------------------------------------------------------------------------------------------------------------------------------------------------------------------------------------------------------------------------------------------------------|-----------------------------------------------------------------------------------------------------------------------------------------------------------------|---------------------------------------------------------------------------------------|
|                                             |          | to specific body parts beginning with one area such as a foot and working through the whole body. Any physical sensations are acknowledged.                                                                                                                                                |                                                                                                                                                                 |                                                                                       |
| Choiceless awareness mindfulness meditation | Formal   | Involves extending awareness beyond just the breath to other dimensions involving physical sensations, sounds in the environment, and any thoughts or feelings. While these feelings and thoughts are acknowledged, one does not engage with these thoughts and only notes their presence. | Written lectures and audios                                                                                                                                     | 45 minutes                                                                            |
| Mindful eating                              | Informal | Involves eating slowly, responding to internal hunger signs (not external triggers), and using all five senses during the eating process (sight, sounds, smells, tastes, and physical sensations of the meal)                                                                              | Article lectures, audios, and videos                                                                                                                            | Can involve one mindful bite for eating the entire meal and all meals mindfully       |
|                                             |          | It can be specially tailored for binge eating and craving control                                                                                                                                                                                                                          | Specially tailored audios in addition to general guided examples                                                                                                |                                                                                       |
| Mindful in general situations               | Informal | Involves being present in everyday situations                                                                                                                                                                                                                                              | Article lectures, but the focus was in the videos. The videos had a main focus on providing fun tips to be mindful in a student context on and off campus daily | Can be a few minutes of awareness to being aware in all situations throughout the day |
| Mindful exercise                            | Informal | Involves being present when exercising and being in tune with one's body                                                                                                                                                                                                                   | Video demos including swimming, tennis, and basketball                                                                                                          | Can be a few minutes to a few hours depending on how long someone                     |

|  |  |  |  |                                     |
|--|--|--|--|-------------------------------------|
|  |  |  |  | exercises or practices<br>sport for |
|--|--|--|--|-------------------------------------|

Adapted from Ref. (104)-(108).

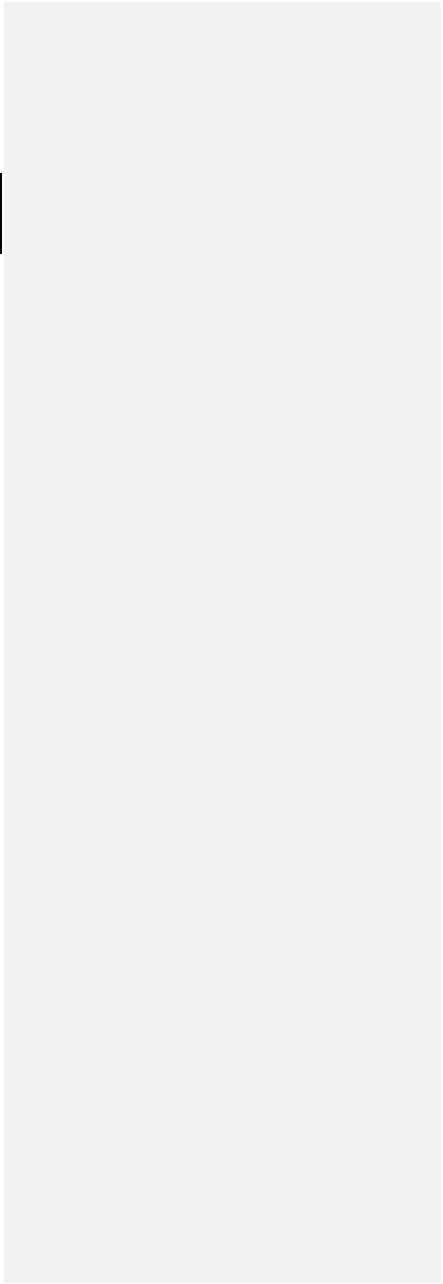

Supplement: mhealth_v7i4e12210_app1.pdf [file mhealth_v7i4e12210_app1.pdf]
