# Supplementary material for: The Mindfulness App Trial for Weight, Weight-Related Behaviors, and Stress in University Students: Randomized Controlled Trial
Source: PubMed Central journal article supplement (PMC6479283; doi:10.2196/12210), 2019-04-10
Supplement: mhealth_v7i4e12210_app2.pdf [file mhealth_v7i4e12210_app2.pdf]

**Table 2. Mindfulness app media content.**

|    | Written lectures                                                                                                                | Audios                                     | Videos                                                                 | Journal                               | Games                                                                                     |
|----|---------------------------------------------------------------------------------------------------------------------------------|--------------------------------------------|------------------------------------------------------------------------|---------------------------------------|-------------------------------------------------------------------------------------------|
| #1 | Lecture 1. Introduction. University student stress and lifestyle challenges. Covers key challenges that are common for students | Audio1. Observing the breath               | Video 1. Intro on stress, lifestyle, and weight in university students | Entry 1. Formal and informal practice | Game 1. User enters their stress and presses the bubble to watch it pop and disappear     |
|    |                                                                                                                                 |                                            |                                                                        |                                       | Game 2. Common issues students face with cloud solutions on how to mindfully address them |
| #2 | Lecture 2. The relationship between stress, lifestyle, and weight in students. Discusses research                               | Audio 2. Diaphragmatic breathing           | Video 2. What is mindfulness?                                          | Daily formal and informal practice    | Repeat of game options                                                                    |
| #3 | Lecture 3: Healthy lifestyle guidelines                                                                                         | Audio 3. Loving kindness meditation        | Video 3. Mindfulness qualities                                         | Daily formal and informal practice    | Repeat of game options                                                                    |
| #4 | Lecture 4. Mindfulness intro: What is mindfulness?                                                                              | Audio 4. Body scan                         | Video 4. Mindfulness of breath                                         | Daily formal and informal practice    | Repeat of game options                                                                    |
| #5 | Lecture 5. Relevance of mindfulness to students: In context                                                                     | Audio 5. Mindful eating coconut meditation | Video 5. Common barriers to formal mindfulness                         | Daily formal and informal             | Repeat of game options                                                                    |

Author 2019-2-9 10:54 PM

**Comment [1]:** Please note that per journal style, a very long table must be uploaded as a Multimedia Appendix. Please delete the table from the manuscript and upload it as a Multimedia Appendix on the website with the caption. In addition, cite this table as a Multimedia Appendix in the body of text as applicable. The table citations must also be emended accordingly. If other Multimedia Appendices are cited in the manuscript, please ensure that all appendices are cited in a sequential order.

|     |                                                               |                                                                                  | meditation practice                       | practice                           |  |
|-----|---------------------------------------------------------------|----------------------------------------------------------------------------------|-------------------------------------------|------------------------------------|--|
| #6  | Lecture 6. Qualities to avoid: Mindfulness barriers           | Audio 6. Binger trigger meditation                                               | Video 6. Mindful eating                   | Daily formal and informal practice |  |
| #7  | Lecture 7. Mindfulness qualities to foster                    | Audio 7. Hunger meditation                                                       | Video 7. Mindful fun eating               | Daily formal and informal practice |  |
| #8  | Lecture 8. What do these qualities mean to me as a student?   | Audio 8. Satiety meditation                                                      | Video 8. WHO dietary guidelines           |                                    |  |
| #9  | Lecture 9. Case study of a mindful versus not mindful student | Audio 9. Sitting meditation (concentrative): Cave meditation                     | Video 9. WHO physical activity guidelines | Daily formal and informal practice |  |
| #10 | Lecture 10. Mindfulness formal technique modules              | Audio 10. Sitting meditation (concentrative) lighthouse meditation               | Video 10. Mindful exercise                | Daily formal and informal practice |  |
| #11 | Lecture 11. Observing the breath : 10 breaths                 | Audio 11. Sitting Meditation (concentrative) sky meditation                      | Video 11. Mindful swimming                | Daily formal and informal practice |  |
| #12 | Lecture 12. Diaphragmatic breathing: 15 minutes               | Audio 12. Sitting meditation (concentration)<br>Audio 12. Forest fire meditation | Video 12. Mindful tennis                  | Daily formal and informal practice |  |
| #13 | Lecture 13. Student centered                                  | Audio 13. Choiceless                                                             | Video 13. Adopting a                      | Daily formal                       |  |

|     |                                                                                            |                                  |                                                      |                                    |  |
|-----|--------------------------------------------------------------------------------------------|----------------------------------|------------------------------------------------------|------------------------------------|--|
|     | tips/campus tips for mindful breathing                                                     | awareness mindfulness meditation | mindful lifestyle ( barriers to a mindful lifestyle) | and informal practice              |  |
| #14 | Lecture 14. Body scan: 45 minutes                                                          | Review Audios                    | Video 14. Tips for being mindful on and off campus   | Daily formal and informal practice |  |
| #15 | Lecture 15. Sitting meditation: loving kindness                                            |                                  | Video 15. Environmental cues                         | Daily formal and informal practice |  |
| #16 | Lecture 16. Concentrative meditation (sitting): Different exercises                        | Video 16. Loving kindness        |                                                      | Daily formal and informal practice |  |
| #17 | Lecture 17. Mindfulness awareness meditation: 5-45 minutes can increase by 5 min each week | Review audios                    | Review videos                                        | Daily formal and informal practice |  |
| #18 | Lecture 18. Tips when practicing formal choiceless awareness mindfulness meditation        |                                  |                                                      | Daily formal and informal practice |  |
| #19 | Lecture 19. Walking meditation                                                             |                                  |                                                      | Daily formal and informal practice |  |
| #20 | Lecture 20. Mindful eating what is it                                                      |                                  |                                                      | Daily formal and informal          |  |

|     |                                                                           |  |  |                                    |  |
|-----|---------------------------------------------------------------------------|--|--|------------------------------------|--|
|     |                                                                           |  |  | practice                           |  |
| #21 | Lecture 21. Mindful eating case study                                     |  |  | Daily formal and informal practice |  |
| #22 | Lecture 22. Mindful eating tips                                           |  |  | Daily formal and informal practice |  |
| #23 | Lecture 23. Making mindful eating fun/playing with one's senses mindfully |  |  | Daily formal and informal practice |  |
| #24 | Lecture 24. Mindful eating meditation                                     |  |  | Daily formal and informal practice |  |
| #25 | Lecture 25. Binge trigger meditation                                      |  |  | Daily formal and informal practice |  |
| #26 | Lecture 26. Hunger meditation                                             |  |  | Daily formal and informal practice |  |
| #27 | Lecture 27. Satiety meditation                                            |  |  | Daily formal and informal practice |  |
| #28 | Lecture 28. Mindful exercise                                              |  |  | Daily formal                       |  |

|     |                                                                                         |  |  |                                    |  |
|-----|-----------------------------------------------------------------------------------------|--|--|------------------------------------|--|
|     |                                                                                         |  |  | and informal practice              |  |
| #29 | Lecture 29. Mindful exercise alone and in context                                       |  |  | Daily formal and informal practice |  |
| #30 | Lecture 30. Mindful exercise in a group context                                         |  |  | Daily formal and informal practice |  |
| #31 | Lecture 31. Mindful lifestyle barriers                                                  |  |  | Daily formal and informal practice |  |
| #32 | Lecture 32. Overcoming barriers to a mindful lifestyle: Case study of a mindful student |  |  | Daily formal and informal practice |  |
| #33 | Lecture 33. Being in the moment in the real world on and off campus                     |  |  | Daily formal and informal practice |  |
| #34 | Lecture 34. Student context: What students /peers recommend for being mindful on campus |  |  | Daily formal and informal practice |  |
| #35 | Lecture 35. Environmental mindfulness cues on and off campus                            |  |  | Daily formal and informal practice |  |

|     |                                                               |  |  |                                    |  |
|-----|---------------------------------------------------------------|--|--|------------------------------------|--|
| #36 | Lecture 36. Formal mindfulness meditation barriers            |  |  | Daily formal and informal practice |  |
| #37 | Lecture 37. Mindful yoga                                      |  |  | Daily formal and informal practice |  |
| #38 | Lecture 38. Mindfulness informal and formal technique journal |  |  | Daily formal and informal practice |  |
| #39 | Poem 1. Renewal poem                                          |  |  | Daily formal and informal practice |  |
| #40 | Poem 2. Mindfulness for students' poem                        |  |  | Daily formal and informal practice |  |
| #41 | Poem 3. Breathe poem                                          |  |  | Daily formal and informal practice |  |
| #42 | Poem 4. Love and kindness poem                                |  |  | Daily formal and informal practice |  |
