# Supplementary material for: The Mindfulness App Trial for Weight, Weight-Related Behaviors, and Stress in University Students: Randomized Controlled Trial
Source: JMIR Mhealth Uhealth. 2019 Apr 10;7(4):e12210. doi: 10.2196/12210 (PMC6479283; doi:10.2196/12210)
Supplement: Multimedia Appendix 6 [file mhealth_v7i4e12210_app6.pdf]

## Consort E-Health Checklist Essentials

| Section Topic                          | Consort Checklist item                                                       | EHealth Extensions                                                           | Response                  | Page Number                            |
|----------------------------------------|------------------------------------------------------------------------------|------------------------------------------------------------------------------|---------------------------|----------------------------------------|
| Title and Abstract                     | Identification as a RCT                                                      | Mentions Primary Condition or Target Group                                   | Yes<br>Yes                | RCT on title page And abstract p. 1-2) |
| Title and Abstract                     | Structured Summary in Abstract of methods, results, conclusion, trial design | Structured Summary in Abstract of methods, results, conclusion, trial design | Yes                       | Abstract (p. 2)                        |
| Introduction Background and objectives | Scientific Background and Rationale                                          | Describe the problem and solution with rationale                             | Yes                       | Introduc tion (p.3)                    |
| Trial Design                           | Eligibility Criteria                                                         | Settings and Location                                                        | Yes<br>Yes                | Methods section (p. 4)                 |
| Interventions                          | Access                                                                       | Mode of Delivery<br>Report prompts reminders<br>Describe co-interventions    | Yes<br>Yes<br>Yes<br>None | Methods Section (p.4)                  |

| <b>Section Topic</b>   | <b>Consort Checklist item</b>           | <b>EHealth Extensions</b>                           | <b>Response</b>       | <b>Page Number</b> |
|------------------------|-----------------------------------------|-----------------------------------------------------|-----------------------|--------------------|
| Outcomes               | Clearly defined<br>Pre-specified        |                                                     | Yes clear<br>outcomes | Methods<br>(p 5)   |
| Sample size            | Description of how it<br>was calculated |                                                     | Yes                   | Methods<br>(p 5)   |
| Randomization          | Description                             |                                                     | Yes                   | Methods<br>(p. 4)  |
| Sequence<br>generation | Allocation<br>concealment               |                                                     | Yes                   | Methods<br>(p.4)   |
| Blinding               | Description of who<br>was blinded       |                                                     | Yes                   | Methods<br>(p.4)   |
| Statistical<br>Methods | Clear Stat methods                      | Description of<br>analysis methods<br>for attrition | Yes<br>Yes            | Methods<br>(p.5)   |
| Ethics                 | Ethics                                  | Ethics Approval<br>Informed Consent                 | Yes<br>Yes            | Methods<br>(p.5)   |

| Section Topic                        | Consort Checklist item                 | EHealth Extensions                            | Response   | Page Number                                   |
|--------------------------------------|----------------------------------------|-----------------------------------------------|------------|-----------------------------------------------|
| Numbers analysed                     | For each group                         | Report N<br>Effect sizes                      | Yes        | Results<br>(p.6)                              |
| Results                              | Baseline Data                          | Demographics                                  | Yes<br>Yes | Results<br>(p.7)                              |
| Interpretation<br>Principal Findings | Interpretation consistent with results | Restate study questions and summarize answers | Yes        | Discussi<br>on<br>(p.10-11)                   |
| Discussion<br>Limitations            | Trial limitations                      | Typical limitations in e-health trials        | Yes        | Discussi<br>on<br>(limitati<br>ons)<br>(p.11) |

| Section Topic | Consort Checklist item | EHealth Extensions | Response | Page Number |
|---------------|------------------------|--------------------|----------|-------------|
|---------------|------------------------|--------------------|----------|-------------|

| Section Topic | Consort Checklist item | EHealth Extensions | Response | Page Number |
|---------------|------------------------|--------------------|----------|-------------|
|---------------|------------------------|--------------------|----------|-------------|

| Section Topic | Consort Checklist item | EHealth Extensions | Response | Page Number |
|---------------|------------------------|--------------------|----------|-------------|
|---------------|------------------------|--------------------|----------|-------------|

| Section Topic | Consort Checklist item | EHealth Extensions | Response | Page Number |
|---------------|------------------------|--------------------|----------|-------------|
|---------------|------------------------|--------------------|----------|-------------|

| Section Topic | Consort Checklist item | EHealth Extensions | Response | Page Number |
|---------------|------------------------|--------------------|----------|-------------|
|---------------|------------------------|--------------------|----------|-------------|

| Section Topic | Consort Checklist item | EHealth Extensions | Response | Page Number |
|---------------|------------------------|--------------------|----------|-------------|
|---------------|------------------------|--------------------|----------|-------------|

| Section Topic | Consort Checklist item | EHealth Extensions | Response | Page Number |
|---------------|------------------------|--------------------|----------|-------------|
|---------------|------------------------|--------------------|----------|-------------|
